# Supplementary material for: Understanding deep learning in land use classification based on Sentinel-2 time series
Source: Springer Nature journal article supplement (doi:10.1038/s41598-020-74215-5), 2020-10-14
Supplement: 41598_2020_74215_MOESM1_ESM.pdf [file 41598_2020_74215_MOESM1_ESM.pdf]

# Supplementary Information for the manuscript

## “Understanding deep learning in land use classification based on Sentinel-2 time series”

Manuel Campos-Taberner, Francisco Javier García-Haro, Beatriz Martínez, Emma Izquierdo-Verdiguier, Clement Atzberger, Gustau Camps-Valls, María Amparo Gilabert

Table S1 shows the overall accuracy (OA) of the evaluated classifiers. Algorithms using different number of BiLSMT layers reported the best results except in the case of 4-BiLSTM, in which the accuracy was reduced to 94.5% being outpaced by the RF algorithm.

**Table S1.** Overall Accuracy (OA) obtained over the validation data set with different machine and deep learning algorithms.

| Algorithm | Overall Accuracy (OA) |
|-----------|-----------------------|
| 2-BiLSMT  | 98.7                  |
| 1-BiLSMT  | 97.4                  |
| 3-BiLSMT  | 95.6                  |
| RF        | 94.9                  |
| 4-BiLSMT  | 94.5                  |
| SVM       | 92.7                  |
| NN        | 92.6                  |
| k-NN      | 88.6                  |
| DT        | 85.9                  |

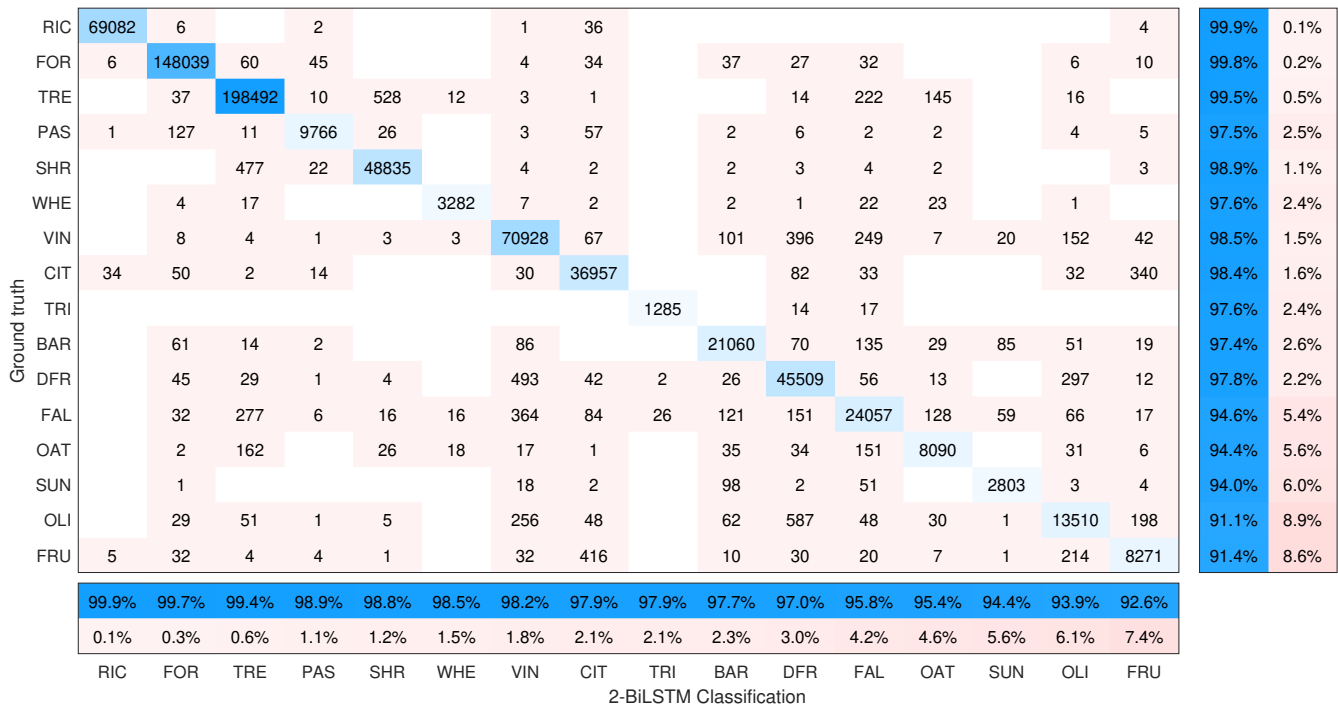

**Figure S1.** Confusion matrix obtained with the 2-BiLSTM. The matrix is sorted according to the true positive rate. The percentages of correctly classified observations (off matrix bottom rows) can be thought of as class-wise precisions, and the percentages of correctly classified observations (off matrix right columns) can be thought of as class-wise recalls.

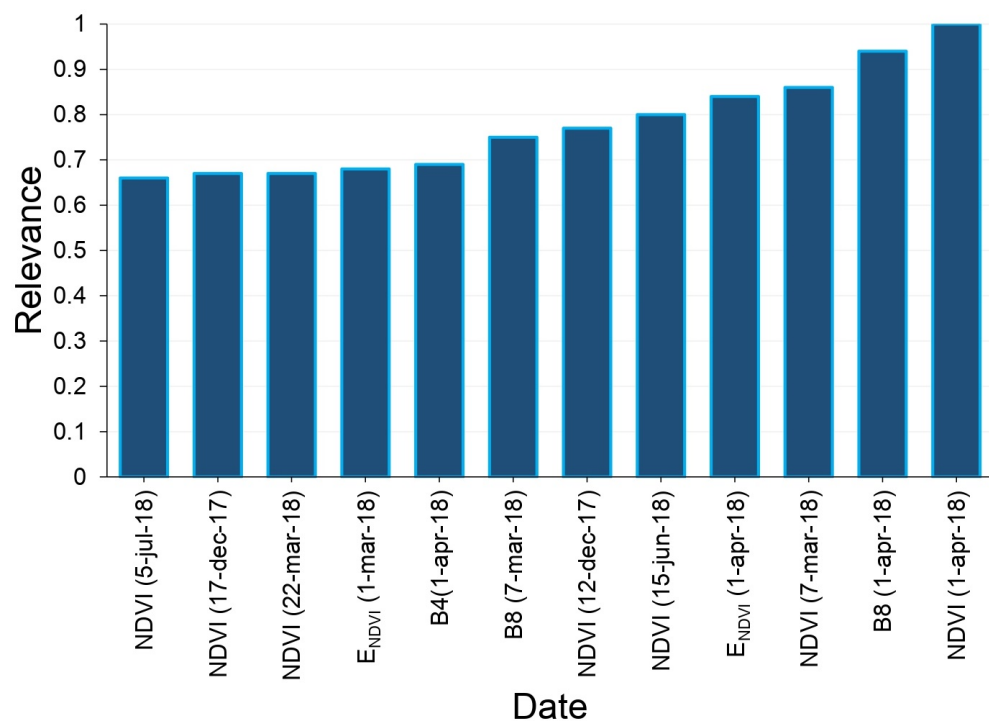

**Figure S2.** Relevance of the top ten predictors provided by the RF classification algorithm.
